# Supplementary material
Source: MDPI journal article supplement (https://www.mdpi.com/2311-7524/9/3/397)
Supplement: s1 [file s1 › horticulturae-2218209-supplementary.pdf]

Table S1. Summary of the statistics associated to a nonlinear mixed effects model for evaluating the effect of control ("intercept") and five different treatments ("treatment") on *Bactrocera oleae* attacks. The attacks at different sampling times are assumed to follow a three-parameter logistic curve, with "b" being the slope at the inflection point ("e"), which represents the point on curve where the response reaches half of its maximum value ("d"). The AIC value of the model is 1959.01. Fitted curves are graphically represented in Figure 1.

| parameter (level) | num df | den df | F-value  | p-value |
|-------------------|--------|--------|----------|---------|
| b (intercept)     | 1      | 199    | 431.6298 | <0.0001 |
| b (treatment)     | 5      | 199    | 16.9097  | <0.0001 |
| d (intercept)     | 1      | 199    | 24.8123  | <0.0001 |
| d (treatment)     | 5      | 199    | 2.5547   | 0.0289  |
| e (intercept)     | 1      | 199    | 8.9848   | 0.0031  |
| e (treatment)     | 5      | 199    | 0.0504   | 0.9984  |
